# Supplementary material for: TAS‐115 inhibits PDGFRα/AXL/FLT‐3 signaling and suppresses lung metastasis of osteosarcoma
Source: PubMed Central journal article supplement (PMC7193166; doi:10.1002/2211-5463.12827), 2020-03-30

# Supporting Information

## Figure S1

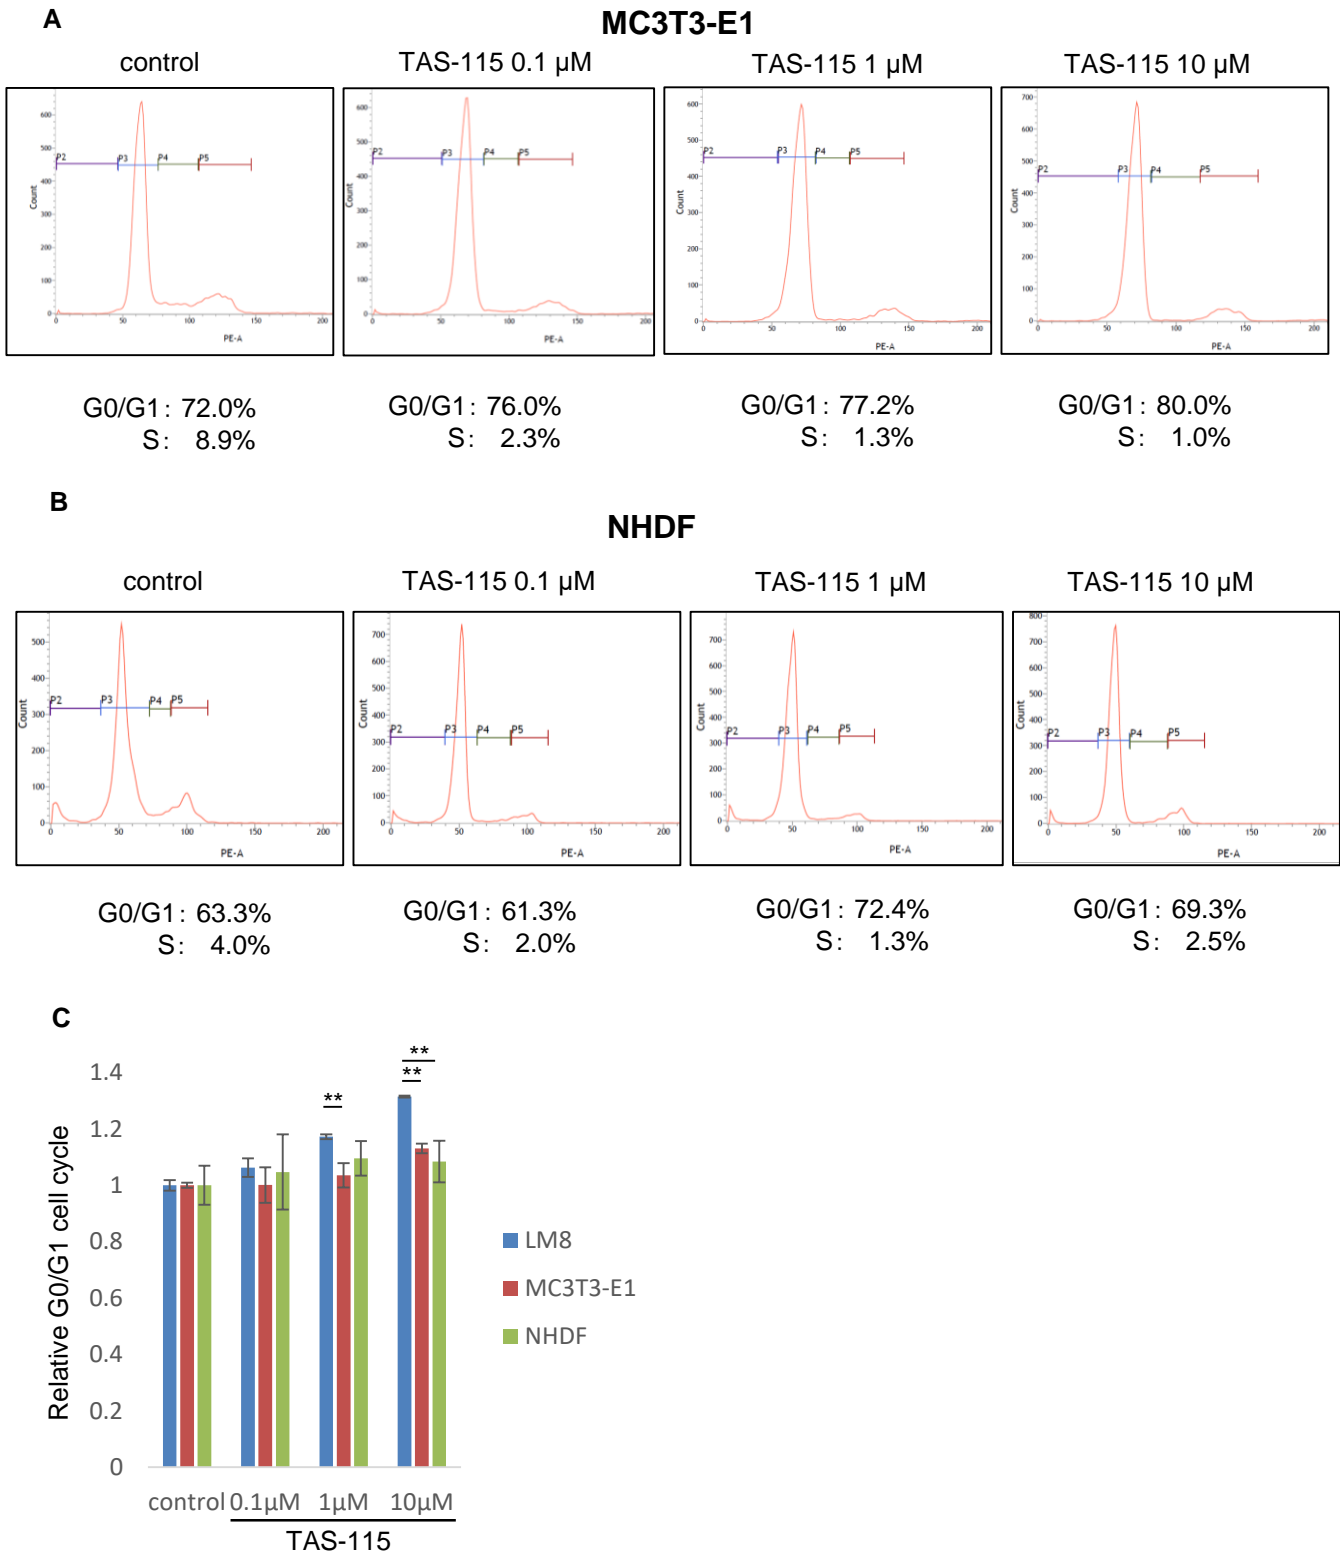

Supplement: FEB4-10-767-s001.pdf [file FEB4-10-767-s001.pdf]
